# Supplementary material for: Unravelling the effect of winter holiday celebrations on SARS-CoV-2 transmission
Source: Research Square preprint supplement (doi:10.21203/rs.3.rs-2365444/v1), 2022-12-21
Supplement: Supplementary file 1 [file 1f44048d51059135e2c8ef01.xlsx]

## Sheet: Figure 1
a.
b.
c.

## Sheet: Figure 1 data - panel a, b
		New positive tests				New positive tests, not excluded, SGTF		New positive tests, not excluded, SGTF, by onset date
		Weak signal (excluded)	No SGTF info	SGTF (Omicron BA.1)	S-gene positive (Delta or Omicron BA.2)	No contact tracing data	Tracing interview succesful	Not interviewed	Interviewed	Other/unknown source	NYE (subgroup 1)	Possibly infected on NYE	Likely infected on NYE	Ski trip
2021-12-10	10-Dec	0	0	0	8	0	0	0	0	0	0	0	0	0
2021-12-11	11-Dec	2	0	0	10	0	0	0	0	0	0	0	0	0
2021-12-12	12-Dec	0	0	0	1	0	0	0	0	0	0	0	0	0
2021-12-13	13-Dec	3	0	0	10	0	0	1	2	2	0	0	0	0
2021-12-14	14-Dec	4	0	1	4	0	1	0	1	1	0	0	0	0
2021-12-15	15-Dec	1	0	0	2	0	0	0	2	2	0	0	0	0
2021-12-16	16-Dec	2	0	4	6	0	4	0	0	0	0	0	0	0
2021-12-17	17-Dec	1	0	0	3	0	0	0	1	1	0	0	0	0
2021-12-18	18-Dec	1	0	0	2	0	0	0	2	2	0	0	0	0
2021-12-19	19-Dec	0	0	0	0	0	0	0	3	3	0	0	0	0
2021-12-20	20-Dec	2	0	4	9	0	4	1	11	11	0	0	0	0
2021-12-21	21-Dec	3	0	13	8	1	12	0	6	6	0	0	0	0
2021-12-22	22-Dec	4	0	10	5	0	10	2	6	6	0	0	0	0
2021-12-23	23-Dec	2	0	15	6	6	9	2	5	5	0	0	0	0
2021-12-24	24-Dec	0	0	14	5	3	11	0	10	9	0	0	0	1
2021-12-25	25-Dec	0	0	0	0	0	0	2	6	6	0	0	0	0
2021-12-26	26-Dec	0	0	0	0	0	0	0	15	15	0	0	0	0
2021-12-27	27-Dec	5	0	25	2	3	21	2	13	13	0	0	0	0
2021-12-28	28-Dec	2	0	17	1	2	15	2	19	19	0	0	0	0
2021-12-29	29-Dec	3	0	25	1	4	20	4	14	14	0	0	0	0
2021-12-30	30-Dec	4	0	35	6	12	21	0	8	8	0	0	0	0
2021-12-31	31-Dec	1	0	18	1	3	15	1	5	5	0	0	0	0
2022-01-01	1-Jan	0	0	0	0	0	0	0	10	4	6	0	6	0
2022-01-02	2-Jan	0	0	0	0	0	0	1	35	19	16	6	10	0
2022-01-03	3-Jan	2	0	54	1	17	33	1	44	17	26	9	17	1
2022-01-04	4-Jan	7	0	72	3	17	54	3	22	8	14	8	6	0
2022-01-05	5-Jan	4	0	58	1	14	43	1	25	16	9	4	5	0
2022-01-06	6-Jan	2	0	33	2	5	26	0	13	11	2	2	0	0
2022-01-07	7-Jan	1	0	18	0	2	15	0	13	12	1	1	0	0
2022-01-08	8-Jan	0	0	12	1	0	10	0	10	9	1	1	0	0
2022-01-09	9-Jan	0	0	0	0	0	0	1	8	8	0	0	0	0
2022-01-10	10-Jan	5	0	38	2	6	31	1	16	16	0	0	0	0
2022-01-11	11-Jan	2	0	24	0	8	16	3	19	19	0	0	0	0
2022-01-12	12-Jan	1	0	23	0	5	17	0	19	19	0	0	0	0
2022-01-13	13-Jan	2	0	22	0	2	20	1	14	14	0	0	0	0
2022-01-14	14-Jan	9	0	23	2	2	21	2	17	17	0	0	0	0
2022-01-15	15-Jan	2	0	18	1	3	15	1	24	24	0	0	0	0
2022-01-16	16-Jan	0	0	0	0	0	0	0	23	22	0	0	0	1
2022-01-17	17-Jan	6	0	58	2	8	49	1	27	27	0	0	0	0
2022-01-18	18-Jan	5	0	27	3	5	24	1	31	30	0	0	0	1
2022-01-19	19-Jan	2	0	37	4	5	35	0	19	19	0	0	0	0
2022-01-20	20-Jan	3	0	37	3	5	34	3	21	21	0	0	0	0
2022-01-21	21-Jan	3	0	20	3	1	22	2	21	21	0	0	0	0
2022-01-22	22-Jan	3	0	14	0	3	10	2	18	18	0	0	0	0
2022-01-23	23-Jan	0	0	0	0	0	0	1	16	16	0	0	0	0
2022-01-24	24-Jan	4	0	51	4	5	46	2	29	29	0	0	0	0
2022-01-25	25-Jan	1	0	38	3	5	35	5	32	32	0	0	0	0
2022-01-26	26-Jan	0	0	31	2	7	26	3	19	19	0	0	0	0
2022-01-27	27-Jan	3	0	28	7	5	27	4	9	9	0	0	0	0
2022-01-28	28-Jan	1	0	29	7	12	21	2	12	12	0	0	0	0
2022-01-29	29-Jan	0	0	7	2	0	8	1	13	13	0	0	0	0
2022-01-30	30-Jan	0	0	0	0	0	0	3	10	10	0	0	0	0
2022-01-31	31-Jan	0	0	20	3	1	21	2	16	16	0	0	0	0
2022-02-01	1-Feb	1	0	18	3	4	16	4	5	5	0	0	0	0
2022-02-02	2-Feb	0	0	13	1	5	7	1	11	11	0	0	0	0
2022-02-03	3-Feb	0	0	16	5	2	16	1	3	3	0	0	0	0
2022-02-04	4-Feb	1	0	14	2	1	14	0	9	8	0	0	0	1
2022-02-05	5-Feb	0	0	11	0	4	7	2	4	4	0	0	0	0
2022-02-06	6-Feb	0	0	1	0	0	1	3	20	19	0	0	0	1
2022-02-07	7-Feb	4	0	18	5	4	18	3	10	10	0	0	0	0
2022-02-08	8-Feb	0	0	13	5	4	14	2	25	20	0	0	0	5
2022-02-09	9-Feb	0	0	15	6	7	14	4	31	16	0	0	0	15
2022-02-10	10-Feb	3	0	16	4	2	17	1	33	14	0	0	0	19
2022-02-11	11-Feb	1	0	18	4	5	16	2	48	10	0	0	0	38
2022-02-12	12-Feb	3	0	12	3	2	13	4	52	19	0	0	0	33
2022-02-13	13-Feb	0	0	0	0	0	0	4	57	17	0	0	0	40
2022-02-14	14-Feb	9	0	126	76	48	154	8	47	18	0	0	0	29
2022-02-15	15-Feb	5	0	112	56	44	121	4	42	24	0	0	0	18
2022-02-16	16-Feb	10	0	60	35	33	62	5	36	21	0	0	0	15
2022-02-17	17-Feb	9	0	44	24	18	48	1	32	20	0	0	0	12
2022-02-18	18-Feb	6	0	34	21	15	39	8	27	25	0	0	0	2
2022-02-19	19-Feb	1	0	14	7	3	17	8	40	32	0	0	0	8
2022-02-20	20-Feb	0	0	0	0	0	0	5	71	67	0	0	0	4
2022-02-21	21-Feb	7	0	84	50	32	102	5	89	89	0	0	0	0
2022-02-22	22-Feb	3	0	77	54	31	100	7	61	61	0	0	0	0
2022-02-23	23-Feb	9	0	93	29	31	90	3	42	40	0	0	0	2
2022-02-24	24-Feb	5	0	56	30	24	61	4	50	49	0	0	0	1
2022-02-25	25-Feb	4	0	56	37	31	60	7	43	40	0	0	0	3
2022-02-26	26-Feb	2	0	21	21	11	31	13	48	46	0	0	0	2
2022-02-27	27-Feb	0	0	0	0	0	0	14	39	38	0	0	0	1
2022-02-28	28-Feb	2	0	87	84	71	100	7	38	38	0	0	0	0
2022-03-01	1-Mar	10	0	43	76	65	54	11	13	13	0	0	0	0
2022-03-02	2-Mar	7	0	44	49	81	11	4	7	7	0	0	0	0
2022-03-03	3-Mar	4	0	40	29	68	0	5	4	4	0	0	0	0
2022-03-04	4-Mar	6	0	21	30	51	0	6	12	11	0	0	0	1
2022-03-05	5-Mar	2	0	10	14	23	1	6	26	26	0	0	0	0
2022-03-06	6-Mar	0	0	0	0	0	0	5	28	28	0	0	0	0
2022-03-07	7-Mar	5	0	22	61	27	53	4	38	38	0	0	0	0
2022-03-08	8-Mar	4	0	15	45	12	46	0	38	36	0	0	0	2
2022-03-09	9-Mar	4	0	14	45	11	48	1	21	20	0	0	0	1
2022-03-10	10-Mar	7	0	9	21	6	23	2	20	20	0	0	0	0
2022-03-11	11-Mar	0	0	5	37	2	39	0	16	16	0	0	0	0
2022-03-12	12-Mar	0	0	7	10	2	14	1	18	18	0	0	0	0
2022-03-13	13-Mar	0	0	0	0	0	0	1	17	17	0	0	0	0
2022-03-14	14-Mar	3	0	5	29	3	30	1	11	11	0	0	0	0
2022-03-15	15-Mar	4	0	2	16	4	14	0	20	20	0	0	0	0
2022-03-16	16-Mar	4	0	6	28	4	28	1	14	14	0	0	0	0
2022-03-17	17-Mar	2	0	4	20	3	20	0	15	15	0	0	0	0
2022-03-18	18-Mar	1	0	4	20	2	22	2	4	4	0	0	0	0
2022-03-19	19-Mar	1	0	2	9	2	9	1	17	17	0	0	0	0
2022-03-20	20-Mar	0	0	0	0	0	0	2	18	18	0	0	0	0
2022-03-21	21-Mar	3	0	4	26	3	27	1	15	15	0	0	0	0
2022-03-22	22-Mar	1	0	1	14	3	12	1	16	16	0	0	0	0
2022-03-23	23-Mar	5	0	0	21	3	17	2	10	9	0	0	0	1
2022-03-24	24-Mar	5	0	1	22	5	18	2	8	8	0	0	0	0
2022-03-25	25-Mar	1	0	2	13	5	10	0	13	13	0	0	0	0
2022-03-26	26-Mar	1	0	1	13	1	13	0	3	3	0	0	0	0
2022-03-27	27-Mar	0	0	0	0	0	0	1	11	11	0	0	0	0
2022-03-28	28-Mar	1	0	1	15	2	14	2	7	6	0	0	0	1
2022-03-29	29-Mar	2	0	2	12	3	11	0	12	12	0	0	0	0
2022-03-30	30-Mar	1	0	0	13	2	11	0	10	10	0	0	0	0
2022-03-31	31-Mar	0	0	0	15	1	13	1	3	3	0	0	0	0
	Asymptomatic							29	266	211	15	5	10	40
	No symptom data							748	36	25	0	0	0	11

## Sheet: Figure 1 data - panel c
		Estimate	R_eff confidence interval low	95% confidence interval		t_start	t_end	Effective reproduction number	Std(R)	Quantile.0.025(R)	Quantile.0.05(R)	Quantile.0.25(R)	Median(R)	Quantile.0.75(R)	Quantile.0.95(R)	Quantile.0.975(R)	uncorrected_date	incidence	Date
2021-12-10	10-Dec
2021-12-11	11-Dec
2021-12-12	12-Dec
2021-12-13	13-Dec
2021-12-14	14-Dec
2021-12-15	15-Dec					2	2	NA	NA	NA	NA	NA	NA	NA	NA	NA	44545	2	2021-12-15
2021-12-16	16-Dec	0.807287	0.0204387	2.97798	1	3	3	0.807286944161444	0.807286944161444	0.020438735840503583	0.04140840688209902	0.23224198115962938	0.5595686692483589	1.1191373384967178	2.4184155526432156	2.977984221891574	44546	0	2021-12-16
2021-12-17	17-Dec	2.40734	0.291539	6.70641	0.707107	4	4	2.4073354387523906	1.7022432133325083	0.2915394899167678	0.427737179136738	1.1570602164831338	2.0201720937952565	3.241037262502256	5.710036585880839	6.706407293548876	44547	1	2021-12-17
2021-12-18	18-Dec	3.30756	0.682099	7.96537	0.57735	5	5	3.3075639966893906	1.909622963850534	0.682099213148295	0.9015222636801125	1.9043844553393328	2.948208539549329	4.322326902390194	6.941246771430164	7.9653722723632026	44548	2	2021-12-18
2021-12-19	19-Dec	2.7907	0.760371	6.1167	0.5	6	6	2.790697652410571	1.3953488262052856	0.7603711849056387	0.9532453855637819	1.7688280408646657	2.5619028278318	3.5647168219739656	5.409527767524939	6.116702093443081	44549	3	2021-12-19
2021-12-20	20-Dec	6.09053	3.24295	9.82055	0.27735	7	7	6.090528536503901	1.6892086871570355	3.2429499365217627	3.602584309142978	4.882596612766685	5.935093122247354	7.1293303553492215	9.108886409754072	9.820548608175018	44550	12	2021-12-20
2021-12-21	21-Dec	1.15328	0.463679	2.15161	0.377964	8	8	1.1532825993993017	0.4358998499126688	0.4636794193871689	0.5412710601422289	0.8373913949410615	1.0988537689123878	1.4100472622385851	1.9510898344483223	2.151609163925429	44551	6	2021-12-21
2021-12-22	22-Dec	1.44497	0.660733	2.53082	0.333333	9	9	1.4449711142917243	0.4816570380972414	0.6607328055827726	0.7538297967583079	1.097799974215438	1.3918204502911353	1.7343578712379575	2.3175168759308824	2.530817010254892	44552	8	2021-12-22
2021-12-23	23-Dec	1.19295	0.515032	2.15069	0.353553	10	10	1.1929517322181005	0.42177212973982864	0.5150318847553421	0.5936161798047226	0.8881689451621868	1.1436305509055045	1.4441322094522848	1.9606331420015137	2.1506944444952714	44553	7	2021-12-23
2021-12-24	24-Dec	1.60592	0.801671	2.68486	0.301511	11	11	1.6059233537021336	0.48420410966356175	0.8016711520608384	0.900632079563513	1.2584321550472293	1.5575299343468332	1.9007756282713386	2.476365818296486	2.6848638409794074	44554	10	2021-12-24
2021-12-25	25-Dec	1.11605	0.510327	1.95472	0.333333	12	12	1.1160459058376575	0.37201530194588583	0.5103272551470585	0.5822321637086315	0.84790287815018	1.074994164135896	1.3395582668109	1.7899701907606171	1.9547158657934494	44555	8	2021-12-25
2021-12-26	26-Dec	1.9708	1.12648	3.04738	0.25	13	13	1.9707998551783736	0.4926999637945934	1.1264824009492223	1.236178879658894	1.6200040485460898	1.9298970798053372	2.2770733693993654	2.8449887491449064	3.0473762355628478	44556	15	2021-12-26
2021-12-27	27-Dec	1.48499	0.848798	2.29618	0.25	14	14	1.4849859641905578	0.37124649104763946	0.8487977863007667	0.9314534302906773	1.2206634112042232	1.4541659663273547	1.7157612347622748	2.143682094180924	2.296179860947427	44557	15	2021-12-27
2021-12-28	28-Dec	1.74832	1.09566	2.55101	0.213201	15	15	1.748316454538108	0.37274232052382567	1.0956606140404752	1.1835894618101754	1.4846040129393558	1.7218993523675283	1.9832621897054488	2.4031756635670884	2.5510107157544866	44558	21	2021-12-28
2021-12-29	29-Dec	1.20162	0.723456	1.79913	0.229416	16	16	1.2016239740884014	0.2756714458519515	0.7234561278148414	0.78687094936683	1.0060301163833192	1.180609870599551	1.374338667706202	1.6880774272179468	1.7991321445569004	44559	18	2021-12-29
2021-12-30	30-Dec	0.538711	0.246333	0.943533	0.333333	17	17	0.5387106271647885	0.17957020905492949	0.2463328024784199	0.2810409969933742	0.40927912451798026	0.518895125488122	0.6465990962046032	0.8640110223308268	0.9435330612141748	44560	8	2021-12-30
2021-12-31	31-Dec	0.534178	0.214767	0.996584	0.377964	18	18	0.5341784325974388	0.20190046976958598	0.21476743480300386	0.25070639812629514	0.38786367110124453	0.5089680397823949	0.6531069113704112	0.9037074782583704	0.9965841948422859	44561	6	2021-12-31
2022-01-01	1-Jan	1.09005	0.544147	1.82239	0.301511	19	19	1.0900454388574918	0.32866106592078076	0.5441467556674132	0.6113180234621809	0.8541803863543963	1.0571976532409766	1.2901810034160308	1.6808717918908604	1.8223930656878906	44562	10	2022-01-01
2022-01-02	2-Jan	3.636	2.56008	4.89771	0.164399	20	20	3.635998455453983	0.597754463920478	2.56007846292943	2.711729175293173	3.2169884934114092	3.603294694719865	4.019380077648963	4.671838729076591	4.897707066593631	44563	36	2022-01-02
2022-01-03	3-Jan	2.2353	1.63652	2.92598	0.147442	21	21	2.235295960237086	0.3295764089624951	1.6365175811570098	1.7221879355086074	2.005066668990389	2.2191191960719605	2.4478996262736747	2.803590552037997	2.9259800831396565	44564	45	2022-01-03
2022-01-04	4-Jan	0.846481	0.55295	1.20151	0.196116	22	22	0.846481303861591	0.166008641780066	0.5529496913694492	0.5931407344518818	0.7293983476091171	0.8356540625269621	0.9517720222387225	1.1367618872297371	1.2015128731634026	44565	25	2022-01-04
2022-01-05	5-Jan	0.954811	0.629227	1.3472	0.19245	23	23	0.9548110944707737	0.1837534808059808	0.6292265276894445	0.673959034913382	0.8253020350011477	0.9430495257886924	1.071509874908452	1.2757905795929934	1.3472039425849465	44566	26	2022-01-05
2022-01-06	6-Jan	0.527637	0.288464	0.837827	0.267261	24	24	0.527636702386299	0.14101684035833853	0.28846389509156434	0.3189917202445146	0.42695524655402434	0.5151284939311693	0.6147060691650558	0.7789639735823579	0.8378266282142279	44567	13	2022-01-06
2022-01-07	7-Jan	0.661783	0.361803	1.05084	0.267261	25	25	0.6617828941306675	0.17686891816176065	0.3618028664088963	0.4000920763707221	0.5355042161603273	0.6460946026331496	0.7709887497437673	0.9770075328903876	1.0508354105992683	44568	13	2022-01-07
2022-01-08	8-Jan	0.619864	0.309434	1.03632	0.301511	26	26	0.619864404962446	0.18689615019612243	0.3094340775991481	0.34763163933182023	0.48573756473227314	0.6011852083347747	0.7336733419246787	0.9558432666721189	1.0363206459120793	44569	10	2022-01-08
2022-01-09	9-Jan	0.66783	0.32025	1.14097	0.316228	27	27	0.6678298234355065	0.21118633314442956	0.3202503586242747	0.36232477287544684	0.5159577597173837	0.6457055973992842	0.7956421684986461	1.0488411910197786	1.1409741272391596	44570	9	2022-01-09
2022-01-10	10-Jan	1.39934	0.829335	2.116	0.235702	28	28	1.3993362199739143	0.3298267101011684	0.8293353292527693	0.9044613163486037	1.1650655314525398	1.3735096367319204	1.6054901453270998	1.9823331242437716	2.1160021304542096	44571	17	2022-01-10
2022-01-11	11-Jan	1.55748	0.987311	2.25552	0.208514	29	29	1.5574832144067472	0.3247576998557522	0.9873107554692883	1.0644719001237788	1.3279139133399054	1.5349700774544917	1.7625358294584066	2.127306068659039	2.2555244645204175	44572	22	2022-01-11
2022-01-12	12-Jan	1.11015	0.678111	1.64696	0.223607	30	30	1.1101536901686335	0.24823791166893044	0.6781107149376785	0.7357350191902	0.9342025155228924	1.0917069558880332	1.2660196462462814	1.547512038241193	1.6469603791474465	44573	19	2022-01-12
2022-01-13	13-Jan	0.860957	0.492111	1.33127	0.25	31	31	0.860957248780754	0.2152393121951885	0.49211145727093675	0.5400331060688395	0.7077097275936667	0.8430885946603794	0.9947549053440339	1.2428525808138469	1.3312669233642587	44574	15	2022-01-13
2022-01-14	14-Jan	1.16942	0.714311	1.73488	0.223607	32	32	1.1694181298355204	0.2614898432432899	0.7143109743331043	0.7750114941879909	0.9840739784637133	1.149986635173988	1.3336048334203738	1.6301244140197173	1.7348817047153604	44575	19	2022-01-14
2022-01-15	15-Jan	1.46069	0.954172	2.07334	0.196116	33	33	1.4606917088258071	0.2864652125633069	0.9541723200459595	1.0235261535349616	1.2586528656019675	1.4420081755040426	1.6423818166263882	1.9616011080348177	2.0733356825140508	44576	25	2022-01-15
2022-01-16	16-Jan	1.15399	0.73938	1.6594	0.204124	34	34	1.1539854616088614	0.2355562959609847	0.739380259741314	0.7957229200173245	0.987605443042483	1.1379980640919087	1.302954526523389	1.5667941632623015	1.6593970942484382	44577	23	2022-01-16
2022-01-17	17-Jan	1.3296	0.890457	1.85538	0.185695	35	35	1.3296044081938128	0.24690134022124896	0.8904569395084332	0.9511704409556283	1.1558115619136549	1.3143532224329197	1.4867851870144226	1.7600707849609682	1.8553848233123131	44578	28	2022-01-17
2022-01-18	18-Jan	1.36689	0.940902	1.87116	0.174078	36	36	1.366887485374072	0.23794456940909667	0.9409024504092981	1.0004244935693594	1.1997751088023019	1.353105609692802	1.5189867035289975	1.7803690327690762	1.8711634304845624	44579	32	2022-01-18
2022-01-19	19-Jan	0.733034	0.447756	1.08749	0.223607	37	37	0.7330338078548327	0.16391134241689254	0.44775609352108975	0.48580538664625594	0.6168533540227994	0.7208534404048622	0.8359520040562767	1.0218212596499336	1.087486938794128	44580	19	2022-01-19
2022-01-20	20-Jan	1.04074	0.673514	1.4866	0.2	38	38	1.0407432852864447	0.20814865705728894	0.6735141799165625	0.7236132301522487	0.8938337076481621	1.0269000827183594	1.172576421173774	1.4051034828199083	1.486601771504891	44581	24	2022-01-20
2022-01-21	21-Jan	1.01431	0.649889	1.45855	0.204124	39	39	1.0143119199155723	0.20704555365132557	0.6498887860860101	0.6994119679795108	0.8680698382931848	1.0002595696829584	1.1452503964114722	1.3771559943532086	1.4585506564552813	44582	23	2022-01-21
2022-01-22	22-Jan	0.889543	0.550641	1.30841	0.218218	40	40	0.889543024602422	0.19411420210288396	0.5506411524468149	0.5960795931866509	0.7520855416684357	0.8754638334788649	1.0116698819318142	1.2310436257320114	1.3084067192670368	44583	20	2022-01-22
2022-01-23	23-Jan	0.808882	0.479395	1.22315	0.235702	41	41	0.8088818149676026	0.1906552721806913	0.47939462780091524	0.5228209637492865	0.6734623946595852	0.793952841337816	0.9280484304829854	1.1458813060942503	1.2231482465229275	44584	17	2022-01-23
2022-01-24	24-Jan	1.58183	1.08197	2.17511	0.176777	42	42	1.5818285207199372	0.27963041841883823	1.081969537188509	1.1516429688258303	1.3853359881903087	1.5653820030109238	1.7604055994778993	2.068123655023646	2.175114340952654	44585	31	2022-01-24
2022-01-25	25-Jan	1.54854	1.09584	2.07828	0.162221	43	43	1.54853570415141	0.25120566259916777	1.095836028424284	1.15976800682141	1.3725239810250265	1.5349734446717704	1.709772092002311	1.9835717561278798	2.078282683661935	44586	37	2022-01-25
2022-01-26	26-Jan	0.770621	0.488507	1.116	0.208514	44	44	0.770620670602333	0.16068551759091546	0.4885074005516311	0.5266856438149053	0.6570330267026041	0.7594814887896303	0.8720778049445874	1.052560961198465	1.116001610374185	44587	22	2022-01-26
2022-01-27	27-Jan	0.522275	0.285533	0.829313	0.267261	45	45	0.5222753287379448	0.13958395297872284	0.2855327822280145	0.31575041084502176	0.4226169080769079	0.5098942175429113	0.6084599742558127	0.7710488363258066	0.829313381152221	44588	13	2022-01-27
2022-01-28	28-Jan	0.715892	0.400679	1.12107	0.258199	46	46	0.7158917872141132	0.18484246463779494	0.40067919886338854	0.4412914706905121	0.5841106099313768	0.7000474677410805	0.8304283288872919	1.0445570344001198	1.1210684563928834	44589	14	2022-01-28
2022-01-29	29-Jan	0.825372	0.461954	1.29251	0.258199	47	47	0.8253717144321014	0.21311006029507953	0.4619542830489903	0.5087773099695521	0.6734375001187841	0.8071043542513713	0.9574241048273013	1.2042990933866966	1.292511257112662	44590	14	2022-01-29
2022-01-30	30-Jan	0.830409	0.453992	1.31859	0.267261	48	48	0.8304085888927024	0.2219360307622075	0.4539921028732793	0.5020376010211026	0.6719534524565508	0.8107228398046956	0.9674406597769474	1.225954091471054	1.318593693208886	44591	13	2022-01-30
2022-01-31	31-Jan	1.21543	0.731769	1.81981	0.229416	49	49	1.2154318366038976	0.27883918676412794	0.7317693630400615	0.7959128843819314	1.0175904096472814	1.194176260026862	1.3901311949714923	1.7074751269419568	1.8198059741699437	44592	18	2022-01-31
2022-02-01	1-Feb	0.595666	0.285645	1.01768	0.316228	50	50	0.5956658184468936	0.18836607106005254	0.2856449132452708	0.3231728724964324	0.46020466657964576	0.5759322804303137	0.7096670841256255	0.9355060593965	1.0176833430893912	44593	9	2022-02-01
2022-02-02	2-Feb	0.925724	0.492909	1.49267	0.27735	51	51	0.9257243975163196	0.25674975247639226	0.49290925379777556	0.5475715562441966	0.7421258730795157	0.9020991317691965	1.0836161440413998	1.3844969830080658	1.492665437670054	44594	12	2022-02-02
2022-02-03	3-Feb	0.378853	0.123013	0.776011	0.447214	52	52	0.3788529776788021	0.1694282023136024	0.1230125306234746	0.14927940606639176	0.255240857367494	0.3539175477427251	0.47541735066901125	0.693567587896243	0.7760112731676378	44595	4	2022-02-03
2022-02-04	4-Feb	1.01233	0.485452	1.72955	0.316228	53	53	1.012330226254446	0.3201269259197636	0.48545169237337593	0.5492302176858588	0.7821148701408323	0.978793205350323	1.2060746438521346	1.5898865293975186	1.7295462943487907	44596	9	2022-02-04
2022-02-05	5-Feb	0.730788	0.293815	1.36339	0.377964	54	54	0.7307884766863462	0.2762120814719708	0.29381486960893427	0.3429815499876367	0.5306210136335847	0.6962991311087151	0.8934898448687307	1.2363266113070328	1.3633875896059058	44597	6	2022-02-05
2022-02-06	6-Feb	2.80764	1.79891	4.03731		55	55	2.807641170378053	0.5731073540213998	1.798908675088798	1.9359901010705483	2.4028393720919996	2.768743907830901	3.1700822007733844	3.8120027891428423	4.0373052822712	44598	23	2022-02-06
2022-02-07	7-Feb	0.975961	0.533567	1.54971		56	56	0.9759609570295039	0.26083653743374347	0.533566936963959	0.5900337546010869	0.7897321189960752	0.9528247289403985	1.1370117371307233	1.4408368896831394	1.5497141768165081	44599	13	2022-02-07
2022-02-08	8-Feb	1.95843	1.30136	2.74765		57	57	1.9584284575407271	0.3701081899403274	1.3013614873588384	1.3919277635516953	1.6977478171781648	1.9351638214662465	2.193769282111776	2.6043015217671273	2.7476459205268853	44600	27	2022-02-08
2022-02-09	9-Feb	1.89597	1.32792	2.5636		58	58	1.895974107374416	0.3159956845624027	1.3279169557686328	1.4078222085866574	1.6743694148641863	1.87844798295573	2.098485721325043	2.44391774439689	2.563595431352322	44601	35	2022-02-09
2022-02-10	10-Feb	1.37117	0.955071	1.86133		59	59	1.3711718289345334	0.23177034103758054	0.9550714186874294	1.0134777215735544	1.208557313390462	1.3581353909044975	1.5195846311269114	1.7733409422175694	1.8613301893934615	44602	34	2022-02-10
2022-02-11	11-Feb	1.77073	1.31842	2.28871		60	60	1.7707294499314283	0.24795171829408522	1.3184243824801043	1.383555625789517	1.5977873413951758	1.759169598925412	1.9310757157612148	2.1973389392418023	2.2887117928568497	44603	50	2022-02-11
2022-02-12	12-Feb	1.54971	1.17373	1.97712		61	61	1.5497066228737733	0.20526365659543078	1.173732662407367	1.2282255757676062	1.406767850291557	1.5406534933011873	1.6827804402176927	1.9020714911233387	1.9771172865630369	44604	56	2022-02-12
2022-02-13	13-Feb	1.39854	1.07225	1.76751		62	62	1.3985396492859141	0.17761471307411297	1.0722523297497115	1.1197636837615201	1.2749990498228816	1.3910278479388747	1.5138945619217865	1.7029411653206794	1.7675071597427903	44605	61	2022-02-13
2022-02-14	14-Feb	1.10873	0.837522	1.41739		63	63	1.1087284976637233	0.14816007761465158	0.8375215919196717	0.8767902402130588	1.005528902863308	1.1021359525490433	1.2047444245416943	1.3631565817440219	1.4173917793714512	44606	55	2022-02-14
2022-02-15	15-Feb	0.90646	0.666033	1.18336		64	64	0.9064597513821862	0.13222074392854619	0.6660325302219696	0.7004789983792847	0.8141256347341798	0.9000391275459245	0.991798107973149	1.1343442260549637	1.1833649549344027	44607	46	2022-02-15
2022-02-16	16-Feb	0.857724	0.618172	1.13589		65	65	0.8577238627479847	0.1323496653644396	0.6181719159494795	0.6522404012240409	0.7651391449578449	0.8509262188648097	0.9429024770487812	1.0863975398743178	1.135894526226864	44608	41	2022-02-16
2022-02-17	17-Feb	0.748626	0.518445	1.02043		66	66	0.7486260241189076	0.12838830393725434	0.5184452843615388	0.5506830639214549	0.6585024494939737	0.7412994831020977	0.8307683283978422	0.9715642605733456	1.020427236578655	44609	33	2022-02-17
2022-02-18	18-Feb	0.889902	0.623277	1.20326		67	67	0.8899022573055684	0.1483170428842614	0.6232766005909809	0.660781260900822	0.7858889612761966	0.881676122981611	0.9849539469274393	1.1470873515354594	1.203259766209536	44610	35	2022-02-18
2022-02-19	19-Feb	1.2785	0.945845	1.66052		68	68	1.278504714087246	0.18264353058389232	0.9458448257501054	0.9936302888889805	1.1510385023686907	1.2698179999036403	1.3965058908299173	1.5930134114813115	1.6605176483315653	44611	48	2022-02-19
2022-02-20	20-Feb	1.81379	1.43142	2.24075		69	69	1.8137930332758072	0.20670089965058627	1.4314170973052156	1.4877088829600393	1.670429598932302	1.8059471869086026	1.9486061289428218	2.1666418502591145	2.2407489119082116	44612	76	2022-02-20
2022-02-21	21-Feb	1.69422	1.37073	2.05148		70	70	1.6942247627663838	0.17382379301649153	1.3707290061766852	1.4188018794317216	1.5739694993384168	1.6882838369022037	1.8080052755001879	1.989913767156254	2.051477801376079	44613	94	2022-02-21
2022-02-22	22-Feb	0.966515	0.752007	1.20753		71	71	0.9665151862372049	0.116354755215517	0.7520065054394426	0.7834163529934568	0.88570009960162	0.961850062002261	1.0422464411089845	1.165528359829528	1.2075304999732204	44614	68	2022-02-22
2022-02-23	23-Feb	0.658792	0.482318	0.862352		72	72	0.658791786593297	0.09713354971409524	0.4823183865851109	0.5075673588936295	0.5909380576891242	0.6540241318597775	0.7214508489617869	0.8262809317014559	0.8623518678499855	44615	45	2022-02-23
2022-02-24	24-Feb	0.934995	0.704366	1.19778		73	73	0.9349951387999733	0.12607471879654839	0.7043662963933192	0.7377250000591293	0.8471563569303018	0.9293346476541031	1.0166659274267924	1.1515755251524689	1.1977846412053783	44616	54	2022-02-24
2022-02-25	25-Feb	0.906237	0.674753	1.17133		74	74	0.9062373095697843	0.12689860559936952	0.6747532014539223	0.7080865617297921	0.8177276893354293	0.9003211215970109	0.9883005341639054	1.1245707403739902	1.171334230432294	44617	50	2022-02-25
2022-02-26	26-Feb	1.14247	0.875928	1.44388		75	75	1.1424732107440174	0.14509424285880562	0.8759276596286658	0.9147398943710857	1.0415523499033272	1.1363367870767975	1.2367071478951681	1.3911401524050238	1.4438843981544907	44618	61	2022-02-26
2022-02-27	27-Feb	0.946488	0.711031	1.2151		76	76	0.9464877158335109	0.1288006639780258	0.7110307024414976	0.7450514845383741	0.8567260907496618	0.9406516540269042	1.0298900869814007	1.1678331726976228	1.2151027687389657	44619	53	2022-02-27
2022-02-28	28-Feb	0.823017	0.602552	1.07732		77	77	0.8230171638314754	0.12134726058436818	0.6025520030293133	0.6340951066348917	0.7382486760412994	0.8170610153840278	0.9012960447287722	1.032258450660958	1.0773212461751898	44620	45	2022-02-28
2022-03-01	1-Mar
2022-03-02	2-Mar
2022-03-03	3-Mar
2022-03-04	4-Mar
2022-03-05	5-Mar
2022-03-06	6-Mar
2022-03-07	7-Mar
2022-03-08	8-Mar
2022-03-09	9-Mar
2022-03-10	10-Mar
2022-03-11	11-Mar
2022-03-12	12-Mar
2022-03-13	13-Mar
2022-03-14	14-Mar
2022-03-15	15-Mar
2022-03-16	16-Mar
2022-03-17	17-Mar
2022-03-18	18-Mar
2022-03-19	19-Mar
2022-03-20	20-Mar
2022-03-21	21-Mar
2022-03-22	22-Mar
2022-03-23	23-Mar
2022-03-24	24-Mar
2022-03-25	25-Mar
2022-03-26	26-Mar
2022-03-27	27-Mar
2022-03-28	28-Mar
2022-03-29	29-Mar
2022-03-30	30-Mar
2022-03-31	31-Mar
2022-04-01
2022-04-02
2022-04-03	Asymptomatic
2022-04-04	Asymptomatic
2022-04-05
2022-04-06
2022-04-07	No symptom data
2022-04-08

## Sheet: Figure 3 data
	Observed	Weibull	Log-normal	Gamma	Log-logistic
0		0	0	0	0
0.1		0.240962	1.41379e-09	0.00115773	0.000138037
0.2		0.674197	1.36914e-05	0.0191743	0.00208152
0.3		1.22963	0.00103447	0.0925931	0.0101771
0.4		1.88121	0.0139444	0.269956	0.0313688
0.5		2.61256	0.0802821	0.596938	0.0750631
0.6		3.41123	0.282173	1.10819	0.152973
0.7		4.26669	0.723216	1.8234	0.278887
0.8		5.16938	1.49363	2.74655	0.468322
0.9	6	6.11026	2.64205	3.86717	0.738009
1	6	7.08054	4.16469	5.1628	1.10518
1.1	6	8.07154	6.01039	6.60203	1.58663
1.2		9.07466	8.09474	8.1476	2.19754
1.3		10.0813	10.3166	9.75924	2.95016
1.4		11.083	12.5728	11.3962	3.8523
1.5		12.0712	14.7689	13.0193	4.90588
1.6		13.0377	16.8259	14.5924	6.1057
1.7		13.9743	18.6832	16.0837	7.4385
1.8		14.8733	20.2989	17.466	8.88267
1.9	16	15.7269	21.6482	18.7176	10.4086
2	16	16.5283	22.7216	19.822	11.9799
2.1	16	17.2707	23.5211	20.7676	13.5552
2.2		17.9482	24.0583	21.5477	15.091
2.3		18.5553	24.3512	22.1599	16.5439
2.4		19.0874	24.4221	22.6055	17.8741
2.5		19.5405	24.2956	22.889	19.0474
2.6		19.9115	23.9975	23.0176	20.0372
2.7		20.198	23.5533	23.0007	20.8259
2.8		20.3987	22.9873	22.8489	21.4049
2.9	26	20.5131	22.3225	22.5745	21.774
3	26	20.5413	21.5798	22.1899	21.9411
3.1	26	20.4847	20.7783	21.7082	21.9197
3.2		20.3452	19.9346	21.1424	21.7282
3.3		20.1257	19.0634	20.5054	21.3876
3.4		19.8297	18.1774	19.8095	20.9206
3.5		19.4615	17.2872	19.0664	20.3498
3.6		19.0259	16.4019	18.287	19.6971
3.7		18.5284	15.5289	17.4816	18.9827
3.8		17.9748	14.6741	16.6595	18.225
3.9	14	17.3713	13.8423	15.8289	17.4401
4	14	16.7244	13.0372	14.9975	16.6417
4.1	14	16.0407	12.2616	14.1717	15.8413
4.2		15.327	11.5175	13.3573	15.0483
4.3		14.59	10.806	12.5591	14.2702
4.4		13.8362	10.1279	11.7813	13.5128
4.5		13.0721	9.48347	11.0273	12.7805
4.6		12.3038	8.87254	10.2996	12.0763
4.7		11.5373	8.29467	9.60057	11.4024
4.8		10.7778	7.74914	8.9316	10.7598
4.9	9	10.0305	7.23507	8.29381	10.1492
5	9	9.29987	6.75142	7.68783	9.57061
5.1	9	8.58992	6.29703	7.11392	9.02352
5.2		7.90418	5.87069	6.57202	8.50722
5.3		7.24563	5.47112	6.06179	8.02074
5.4		6.61672	5.09703	5.58264	7.56293
5.5		6.01938	4.74713	5.13382	7.13253
5.6		5.45506	4.42013	4.7144	6.72825
5.7		4.9247	4.11475	4.32333	6.34872
5.8		4.42882	3.82976	3.95948	5.9926
5.9	2	3.9675	3.56396	3.62164	5.65854
6	2	3.54048	3.31618	3.30854	5.34526
6.1	2	3.14715	3.08533	3.01892	5.05147
6.2		2.7866	2.87032	2.75148	4.77598
6.3		2.45771	2.67015	2.50494	4.51762
6.4		2.15911	2.48386	2.27803	4.27529
6.5		1.88931	2.31053	2.06951	4.04796
6.6		1.64667	2.14931	1.87817	3.83464
6.7		1.42949	1.99937	1.70284	3.63441
6.8		1.23599	1.85996	1.54241	3.44641
6.9	1	1.06441	1.73035	1.3958	3.26983
7	1	0.912945	1.60988	1.26199	3.1039
7.1	1	0.779869	1.4979	1.14001	2.94792
7.2		0.663485	1.39383	1.02894	2.80123
7.3		0.562167	1.29711	0.927933	2.66321
7.4		0.474369	1.20723	0.836165	2.5333
7.5		0.398636	1.12371	0.752883	2.41096
7.6		0.333609	1.04609	0.67738	2.29569
7.7		0.278031	0.973964	0.608997	2.18702
7.8		0.230746	0.90693	0.547121	2.08454
7.9	1	0.1907	0.844631	0.491187	1.98784
8	1	0.156942	0.786729	0.440668	1.89655
8.1	1	0.128614	0.732909	0.39508	1.81033
8.2		0.104952	0.682879	0.353978	1.72884
8.3		0.0852785	0.636369	0.316949	1.6518
8.4		0.0689963	0.593127	0.283618	1.57892
8.5		0.0555829	0.552919	0.253637	1.50994
8.6		0.0445838	0.515526	0.226692	1.44463
8.7		0.0356063	0.480749	0.202491	1.38276
8.8		0.0283127	0.4484	0.180772	1.32411
8.9	0	0.0224147	0.418305	0.161293	1.2685
9	0	0.0176675	0.390303	0.143835	1.21574
9.1	0	0.0138642	0.364244	0.128199	1.16565
9.2		0.0108315	0.339991	0.114204	1.1181
9.3		0.00842454	0.317415	0.101685	1.07291
9.4		0.00652319	0.296395	0.0904935	1.02996
9.5		0.0050283	0.276822	0.0804947	0.989122
9.6		0.00385854	0.258593	0.0715667	0.950266
9.7		0.00294752	0.241613	0.0635993	0.913284
9.8		0.00224137	0.225793	0.0564932	0.878068
9.9	0	0.00169662	0.211051	0.0501588	0.844521
10	0	0.0012784	0.197312	0.0445151	0.812549
10.1	0	0.000958836	0.184505	0.0394895	0.782065
10.2		0.000715837	0.172564	0.0350166	0.752989
10.3		0.000531946	0.161429	0.0310375	0.725244
10.4		0.000393455	0.151044	0.0274995	0.698757
10.5		0.000289661	0.141355	0.0243551	0.673463
10.6		0.000212248	0.132316	0.0215619	0.649297
10.7		0.000154792	0.123879	0.0190818	0.626201
10.8		0.000112356	0.116005	0.0168806	0.604119
10.9	0	8.11667e-05	0.108653	0.0149278	0.582997
11	0	5.83561e-05	0.101788	0.0131962	0.562787
11.1	0	4.17555e-05	0.0953765	0.0116613	0.543443
11.2		2.97339e-05	0.089387	0.0103014	0.52492
11.3		2.10714e-05	0.0837908	0.00909695	0.507177
11.4		1.48604e-05	0.078561	0.00803063	0.490176
11.5		1.04292e-05	0.0736726	0.00708696	0.47388
11.6		7.28374e-06	0.0691024	0.00625216	0.458253
11.7		5.06207e-06	0.0648289	0.00551394	0.443265
11.8		3.50078e-06	0.060832	0.00486136	0.428883
11.9	0	2.40911e-06	0.057093	0.0042847	0.415079
12	0	1.64967e-06	0.0535946	0.00377529	0.401825
12.1	0	1.12403e-06	0.0503207	0.00332546	0.389095
12.2		7.62057e-07	0.0472562	0.00292838	0.376865
12.3		5.14071e-07	0.0443872	0.00257796	0.365111
12.4		3.45045e-07	0.0417007	0.00226883	0.353812
12.5		2.30429e-07	0.0391845	0.00199622	0.342946
12.6		1.53108e-07	0.0368273	0.00175588	0.332494
12.7		1.01217e-07	0.0346188	0.00154406	0.322437
12.8		6.65726e-08	0.0325491	0.00135743	0.312758
12.9	0	4.35627e-08	0.0306091	0.00119305	0.303439
13	0	2.83598e-08	0.0287903	0.0010483	0.294464
13.1	0	1.83677e-08	0.0270848	0.000920884	0.285819
13.2		1.18348e-08	0.0254852	0.000808751	0.277489
13.3		7.58608e-09	0.0239847	0.000710098	0.269461
13.4		4.8374e-09	0.0225768	0.000623327	0.261721
13.5		3.06859e-09	0.0212556	0.000547029	0.254257
13.6		1.93638e-09	0.0200155	0.000479957	0.247057
13.7		1.21551e-09	0.0188513	0.000421012	0.240111
13.8		7.58992e-10	0.0177582	0.000369221	0.233407
13.9	0	4.71431e-10	0.0167315	0.000323729	0.226936
14	0	2.91269e-10	0.0157671	0.000283779	0.220688
