# Supplementary material for: Unravelling the effect of winter holiday celebrations on SARS-CoV-2 transmission
Source: Research Square preprint supplement (doi:10.21203/rs.3.rs-2365444/v1), 2022-12-21
Supplement: Supplementary file 1 [file 23496be50df2ef0536ee3835.pdf]

## SUPPLEMENTAL TABLE

### **Data Availability**

GISAID Identifier: EPI\_SET\_221128mt

doi: [10.55876/gis8.221128mt](https://doi.org/10.55876/gis8.221128mt)

All genome sequences and associated metadata in this dataset are published in GISAID's EpiCoV database. To view the contributors of each individual sequence with details such as accession number, Virus name, Collection date, Originating Lab and Submitting Lab and the list of Authors, visit [10.55876/gis8.221128mt](https://gisaid.org/221128mt)

### **Data Snapshot**

- EPI\_SET\_221128mt is composed of 8,687 individual genome sequences.
- The collection dates range from 2019-12-31 to 2022-01-20;
- Data were collected in 33 countries and territories;
- All sequences in this dataset are compared relative to hCoV-19/Wuhan/WIV04/2019 (WIV04), the official reference sequence employed by GISAID (EPI\_ISL\_402124). Learn more at <https://gisaid.org/WIV04>.
