# Supplementary material for: Unravelling the effect of winter holiday celebrations on SARS-CoV-2 transmission
Source: Research Square preprint supplement (doi:10.21203/rs.3.rs-2365444/v1), 2022-12-21
Supplement: Supplementary file 2 [file bfac636270adee7936104c54.xlsx]

## Sheet: Sheet1
Sample date	Symptom onset date	Last known asymptomatic date	Possibly infected on NYE	Likely infected on NYE	Other attendees at NYE	Other attendees who tested positive	Other attendees who tested negative	Shared NYE event code
2022-01-03	NA	2022-01-12	TRUE	TRUE	15	10	4	A
2022-01-03	2022-01-03	NA	TRUE	TRUE	9	5	4
2022-01-03	2022-01-03	NA	TRUE	TRUE	10	?	?
2022-01-03	2022-01-03	NA	TRUE	TRUE	4	1	?
2022-01-03	2022-01-01	NA	TRUE	TRUE	5	3	2	C
2022-01-03	2022-01-03	NA	TRUE	TRUE	13	9	4	F
2022-01-03	NA	2022-01-12	TRUE	TRUE	15	10	4	A
2022-01-03	2022-01-03	NA	TRUE	TRUE	5	2	3
2022-01-03	2022-01-04	NA	TRUE	TRUE	15	10	4	A
2022-01-03	2022-01-03	NA	TRUE	TRUE	4	4	0
2022-01-04	2022-01-01	NA	TRUE	TRUE	?
2022-01-04	2022-01-02	NA	TRUE	FALSE	2	1	0
2022-01-04	2022-01-02	NA	TRUE	TRUE	2	2	0
2022-01-04	2022-01-03	NA	TRUE	TRUE	18	8	6	B
2022-01-04	2022-01-04	NA	TRUE	TRUE	?	5	?
2022-01-04	2022-01-04	NA	TRUE	FALSE	8	?
2022-01-04	2022-01-02	NA	TRUE	TRUE	7	4	1	H
2022-01-04	2022-01-04	NA	TRUE	FALSE	18	8	6	B
2022-01-04	2022-01-03	NA	TRUE	TRUE	4	4	0
2022-01-04	NA	2022-01-05	TRUE	TRUE	8	8	0
2022-01-04	2022-01-02	NA	TRUE	TRUE	1	1	0
2022-01-04	NA	2022-01-07	TRUE	TRUE	9	1	1
2022-01-04	2022-01-03	NA	TRUE	TRUE	18	8	6	B
2022-01-04	NA	2022-01-05	TRUE	FALSE	5	2	3	I
2022-01-04	2022-01-03	NA	TRUE	TRUE	15	?
2022-01-04	NA	2022-01-12	TRUE	FALSE	5	3	2	C
2022-01-04	NA	2022-01-12	TRUE	TRUE	14	1	?
2022-01-04	2022-01-02	NA	TRUE	FALSE	6	2	2	G
2022-01-04	2022-01-02	NA	TRUE	TRUE	2	2	0
2022-01-04	2022-01-05	NA	TRUE	FALSE	?
2022-01-04	2022-01-03	NA	TRUE	FALSE	6	2	4
2022-01-04	NA	2022-01-12	TRUE	FALSE	15	10	4	A
2022-01-04	2022-01-02	NA	TRUE	TRUE	15	6	9
2022-01-04	2022-01-05	NA	TRUE	TRUE	12	6	6
2022-01-04	2022-01-02	NA	TRUE	FALSE	?
2022-01-04	2022-01-03	NA	TRUE	FALSE	4	4	0
2022-01-04	NA	2022-01-06	TRUE	TRUE	6	3	3	D
2022-01-04	2022-01-03	NA	TRUE	TRUE	4	1	?
2022-01-04	2022-01-01	NA	TRUE	TRUE	6	2	0
2022-01-04	2022-01-02	NA	TRUE	TRUE	6	3	3	D
2022-01-04	2022-01-03	NA	TRUE	TRUE	10	10	0
2022-01-04	2022-01-01	NA	TRUE	TRUE	8	7	1
2022-01-04	2022-01-03	NA	TRUE	FALSE	?
2022-01-04	2022-01-02	NA	TRUE	TRUE	30	7	?
2022-01-04	2022-01-03	NA	TRUE	TRUE	5	5	0
2022-01-04	2022-01-03	NA	TRUE	FALSE	5	?
2022-01-05	2022-01-03	NA	TRUE	TRUE	12	?
2022-01-05	2022-01-02	NA	TRUE	TRUE	?
2022-01-05	2022-01-05	NA	TRUE	FALSE	?
2022-01-05	2022-01-04	NA	TRUE	FALSE	35	20	?	E
2022-01-05	2022-01-05	NA	TRUE	TRUE	10	3	?
2022-01-05	2022-01-01	NA	TRUE	TRUE	2	2	0
2022-01-05	2022-01-04	NA	TRUE	FALSE	?
2022-01-05	2022-01-04	NA	TRUE	TRUE	1	1	0
2022-01-05	2022-01-05	NA	TRUE	TRUE	35	20	?	E
2022-01-05	2022-01-04	NA	TRUE	TRUE	9	?
2022-01-05	2022-01-02	NA	TRUE	FALSE	10	4	6
2022-01-05	NA	2022-01-14	TRUE	TRUE	13	9	4	F
2022-01-05	2022-01-02	NA	TRUE	FALSE	6	?
2022-01-05	2022-01-04	NA	TRUE	TRUE	5	5	0
2022-01-05	2022-01-04	NA	TRUE	FALSE	8	?
2022-01-05	2022-01-03	NA	TRUE	TRUE	6	2	2	G
2022-01-05	2022-01-03	NA	TRUE	FALSE	?
2022-01-05	2022-01-03	NA	TRUE	FALSE	4	2	2
2022-01-05	2022-01-02	NA	TRUE	TRUE	veel	?
2022-01-05	NA	2022-01-06	TRUE	FALSE	35	20	?	E
2022-01-05	NA	2022-01-07	TRUE	TRUE	7	4	1	H
2022-01-05	2022-01-03	NA	TRUE	FALSE	1	1	0
2022-01-05	2022-01-06	NA	TRUE	FALSE	1	1	0
2022-01-05	NA	2022-01-10	TRUE	TRUE	5	2	3	I
2022-01-05	2022-01-04	NA	TRUE	TRUE	6	1	0
2022-01-05	2022-01-03	NA	TRUE	FALSE	2	?
2022-01-05	2022-01-03	NA	TRUE	FALSE	?
2022-01-05	2022-01-03	NA	TRUE	TRUE	11	9	2
2022-01-06	2022-01-04	NA	TRUE	FALSE	18	8	6	B
2022-01-06	2022-01-05	NA	TRUE	TRUE	6	3	1
2022-01-06	2022-01-03	NA	TRUE	TRUE	?
2022-01-06	2022-01-01	NA	TRUE	TRUE	15	2	3	J
2022-01-06	NA	2022-01-07	TRUE	TRUE	?
2022-01-06	2022-01-05	NA	TRUE	FALSE	4	?
2022-01-06	NA	2022-01-07	TRUE	FALSE	?
2022-01-06	2022-01-02	NA	TRUE	TRUE	13	9	4	F
2022-01-07	2022-01-02	NA	TRUE	FALSE	2	1	1
2022-01-07	2022-01-05	NA	TRUE	TRUE	?
2022-01-07	2022-01-04	NA	TRUE	FALSE	5	2	?
2022-01-08	2022-01-06	NA	TRUE	FALSE	4	?
2022-01-10	2022-01-07	NA	TRUE	FALSE	3	1	?
2022-01-10	2022-01-08	NA	TRUE	FALSE	?
2022-01-12	2022-01-04	NA	TRUE	FALSE	15	2	3	J
2022-01-13	2022-01-05	NA	TRUE	FALSE	?
