# Supplementary material for: Unravelling the effect of winter holiday celebrations on SARS-CoV-2 transmission
Source: Research Square preprint supplement (doi:10.21203/rs.3.rs-2365444/v1), 2022-12-21
Supplement: Supplementary file 2 [file e562d1706dea402f7341b560.pdf]

## SUPPLEMENTAL TABLE

### **Data Availability**

GISAID Identifier: EPI\_SET\_221010sa

doi: [10.55876/gis8.221010sa](https://doi.org/10.55876/gis8.221010sa)

All genome sequences and associated metadata in this dataset are published in GISAID's EpiCoV database. To view the contributors of each individual sequence with details such as accession number, Virus name, Collection date, Originating Lab and Submitting Lab and the list of Authors, visit [10.55876/gis8.221010sa](https://gisaid.org/221010sa)

### **Data Snapshot**

- EPI\_SET\_221010sa is composed of 83 individual genome sequences.
- The collection dates range from 2022-01-03 to 2022-01-13;
- Data were collected in 1 countries and territories;
- All sequences in this dataset are compared relative to hCoV-19/Wuhan/WIV04/2019 (WIV04), the official reference sequence employed by GISAID (EPI\_ISL\_402124). Learn more at <https://gisaid.org/WIV04>.
